# Supplementary material for: AQUARIUM: accurate quantification of circular isoforms using model-based strategy
Source: Oxford University Press journal article supplement (doi:10.1093/bioinformatics/btab435), 2021-06-08
Supplement: btab435_supplementary_data.zip [file btab435_supplementary_data.zip]

Archive with 2 entries (2 files):
- Supplementary Data_w_figures_revision.pdf
- Supplementary Tables.xlsx
