# Supplementary material for: AQUARIUM: accurate quantification of circular isoforms using model-based strategy
Source: Oxford University Press journal article supplement (doi:10.1093/bioinformatics/btab435), 2021-06-08
Supplement: btab435_supplementary_data.zip [file btab435_supplementary_data.zip › Supplementary Tables.xlsx]

## Sheet: Supplementary_Table_S1
Supplementary Table S1. The public RNA-seq data used in this study
Dataset	GEO /CRA / SRA	Sample ID	Run number	Sample title
Fetal-R1	GSE64283	GSM1567911	SRR1721279	Adrenal_10wk
Fetal-R1	GSE64283	GSM1567915	SRR1721283	Adrenal_20wkB
Fetal-R1	GSE64283	GSM1567922	SRR1721290	Heart_20wkC
Fetal-R1	GSE64283	GSM1567924	SRR1721292	Intestine_10wkB
Fetal-R1	GSE64283	GSM1567929	SRR1721297	Intestine_20wkB
Fetal-R1	GSE64283	GSM1567930	SRR1721298	Kidney_10wk
Fetal-R1	GSE64283	GSM1567932	SRR1721300	Kidney_20wk
Fetal-R1	GSE64283	GSM1567933	SRR1721301	Lung_10wkA
Fetal-R1	GSE64283	GSM1567938	SRR1721306	Lung_20wkB
Fetal-R1	GSE64283	GSM1567939	SRR1721307	Stomach_10wkA
Fetal-R1	GSE64283	GSM1567945	SRR1721313	Stomach_20wkC
Hela-R2	CRA001838	SAMC079921	CRR060056	Control
Hela-R2	CRA001838	SAMC079924	CRR060059	MBNL1
Hela-R2	CRA001838	SAMC079927	CRR060062	PTBP1
Hela-R2	CRA001838	SAMC079930	CRR060065	TRA2B
Hela-R3	PRJNA475651	SAMN09407364	SRR7309440	Hela_high RIN_no fragmentation

## Sheet: Supplementary_Table_S2
Supplementary Table S2. The source code and version of the computational tools used in this study
Tools	Version	Website
AQUARIUM	v1.0	https://github.com/wanjun-group-seu/AQUARIUM
CIRIquant	v1.1	https://github.com/Kevinzjy/CIRIquant
CIRI2	v2.0.6	https://sourceforge.net/projects/ciri/files/CIRI2
CIRI-full	v2.0	https://sourceforge.net/projects/ciri/files/CIRI-full
CIRI-vis	v1.4	https://sourceforge.net/projects/ciri/files/CIRI-vis
CLEAR	--	https://github.com/YangLab/CLEAR
KNIFE	v1.1	https://github.com/lindaszabo/KNIFE
Salmon	v1.3.0	https://github.com/COMBINE-lab/salmon
Polyester	--	https://github.com/alyssafrazee/polyester

## Sheet: Supplementary_Table_S3
Supplementary Table S3. CircRNA BSJ sites that can be amplified by RT-qPCR using the primers
Gene	BSJ sites	Primer
ASXL1	20:32366384|32369123	F：CATTCCAATTCAAGAGGAGGAGA
	20:32366384|32371874	R：GCCTCTATGACCTGCAGAATC
CAMSAP1	9:135881633|135883078	F：AAGGTGGTGGCCAGTGTCAA
	9:135850137|135883078	R：GCTTAATGTGCTCCTGCTCATAC
	9:135866456|135883078
FAT3	11:92352096|92355404	F：AGGGATGGAGAGATCCAGTA
		R：GCTGCTGAGTTCTCATACAC
HIPK3	11:33286413|33287511	F：CGGCCAGTCATGTATCAAAGAC
	11:33286413|33328633	R：GCTTGGCTCTACTTTGAGTTTCTTC
RHOBTB3	5:95755396|95763620	F：CAGGTGCTTTTCAGTGGGAAGA
		R：TCCACACACTGGCAGCAGA
SETD3	14:99458279|99465813	F：GTCTTCAGCCAGTATAAAAACACAGC
		R：CTTTGGTGACACAGTTGCTGTAG
SLC8A1	2:40428473|40430301	F：GTGGAGAGCTCGAATTCCAGA
	2:40428473|40430304	R：TGGGGTTCCCAAATGGGCAA
	2:40428475|40430301
	2:40428475|40430304
SMARCA5	4:143543509|143543972	F：GAATGAAAAGCTCTCCAAGATGGG
		R：CAGTCTTCTTTGCACCTCTTTC
Abbreviation: F - forward; R - reverse

## Sheet: Supplementary_Table_S4
Supplementary Table S4. The BSJ location, reconstruction type, exon number, circRNA length, and the fraction of exons to the length of circRNAs for all reconstructed circRNAs in samples with RT-qPCR values
SRR_id	gene_name	BSJ location	Reconstruction type	Exon number	CircRNA length	Fraction of exons to the length of circRNA
SRR1721279	FAT3	11:92352096|92355404	BSJ	1	3309	1
	HIPK3	11:33286413|33287511	BSJ	1	1099	1
		11:33286413|33328633	N.A.	N.A.	N.A.	N.A.
	SETD3	14:99458279|99465813	Break	5	678	1
	ASXL1	20:32366384|32369123	Full	2	192	1
		20:32366384|32371874	N.A.	N.A.	N.A.	N.A.
	SLC8A1	2:40428473|40430301	BSJ	1	1829	0.998
		2:40428473|40430304	BSJ	1	1832	1
		2:40428475|40430301	N.A.	N.A.	N.A.	N.A.
		2:40428475|40430304	N.A.	N.A.	N.A.	N.A.
	SMARCA5	4:143543509|143543972	Full	2	269	1
	RHOBTB3	5:95755396|95763620	Full	2	479	1
	CAMSAP1	9:135881633|135883078	Full	2	168	1
		9:135850137|135883078	BSJ	6	1079	1
		9:135866456|135883078	Break	3	506	1
SRR1721298	FAT3	11:92352096|92355404	BSJ	1	3309	1
	HIPK3	11:33286413|33287511	BSJ	1	1099	1
		11:33286413|33328633	N.A.	N.A.	N.A.	N.A.
	SLC8A1	2:40428473|40430301	BSJ	1	1829	0.998
		2:40428473|40430304	BSJ	1	1832	1
		2:40428475|40430301	N.A.	N.A.	N.A.	N.A.
		2:40428475|40430304	N.A.	N.A.	N.A.	N.A.
	SMARCA5	4:143543509|143543972	Full	2	269	1
	CAMSAP1	9:135881633|135883078	BSJ	2	425	1
		9:135850137|135883078	Break	6	1079	1
		9:135866456|135883078	N.A.	N.A.	N.A.	N.A.
SRR1721313	FAT3	11:92352096|92355404	BSJ	1	3309	1
	HIPK3	11:33286413|33287511	BSJ	1	1099	1
		11:33286413|33328633	N.A.	N.A.	N.A.	N.A.
	SETD3	14:99458279|99465813	Break	5	678	1
	ASXL1	20:32366384|32369123	Break	3	198	1
		20:32366384|32371874	Full	3	212	1
	SLC8A1	2:40428473|40430301	BSJ	1	1829	0.998
		2:40428473|40430304	BSJ	1	1832	1
		2:40428475|40430301	N.A.	N.A.	N.A.	N.A.
		2:40428475|40430304	N.A.	N.A.	N.A.	N.A.
	SMARCA5	4:143543509|143543972	Full	2	269	1
	RHOBTB3	5:95755396|95763620	Full	2	479	1
	CAMSAP1	9:135881633|135883078	Full	2	425	1
		9:135850137|135883078	BSJ	6	1079	1
		9:135866456|135883078	N.A.	N.A.	N.A.	N.A.
SRR1721290	FAT3	11:92352096|92355404	BSJ	1	3309	1
	HIPK3	11:33286413|33287511	BSJ	1	1099	1
		11:33286413|33328633	Break	4	1446	1
	SETD3	14:99458279|99465813	Break	5	678	1
	ASXL1	20:32366384|32369123	Full	3	192	1
		20:32366384|32371874	Full	3	289	1
	SLC8A1	2:40428473|40430301	BSJ	1	1829	0.998
		2:40428473|40430304	BSJ	1	1832	1
		2:40428475|40430301	BSJ	1	1827	0.9973
		2:40428475|40430304	BSJ	1	1830	0.9989
	SMARCA5	4:143543509|143543972	Full	2	269	1
	RHOBTB3	5:95755396|95763620	Full	2	479	1
	CAMSAP1	9:135881633|135883078	Break	3	425	1
		9:135850137|135883078	Full	2	103	1
		9:135866456|135883078	Break	3	506	1
SRR1721297	FAT3	11:92352096|92355404	BSJ	1	3309	1
	HIPK3	11:33286413|33287511	BSJ	1	1099	1
		11:33286413|33328633	N.A.	N.A.	N.A.	N.A.
	SETD3	14:99458279|99465813	Full	3	210	1
	ASXL1	20:32366384|32369123	BSJ	3	198	1
		20:32366384|32371874	Break	3	295	1
	SLC8A1	2:40428473|40430301	BSJ	1	1829	0.998
		2:40428473|40430304	BSJ	1	1832	1
		2:40428475|40430301	N.A.	N.A.	N.A.	N.A.
		2:40428475|40430304	N.A.	N.A.	N.A.	N.A.
	SMARCA5	4:143543509|143543972	Full	2	269	1
	RHOBTB3	5:95755396|95763620	Full	2	479	1
	CAMSAP1	9:135881633|135883078	BSJ	2	425	1
		9:135850137|135883078	Break	6	1079	1
		9:135866456|135883078	N.A.	N.A.	N.A.	N.A.
SRR1721307	FAT3	11:92352096|92355404	BSJ	1	3309	1
	HIPK3	11:33286413|33287511	BSJ	1	1099	1
		11:33286413|33328633	N.A.	N.A.	N.A.	N.A.
	SETD3	14:99458279|99465813	Break	5	678	1
	ASXL1	20:32366384|32369123	Full	2	192	1
		20:32366384|32371874	N.A.	N.A.	N.A.	N.A.
	SLC8A1	2:40428473|40430301	BSJ	1	1829	0.998
		2:40428473|40430304	BSJ	1	1832	1
		2:40428475|40430301	N.A.	N.A.	N.A.	N.A.
		2:40428475|40430304	N.A.	N.A.	N.A.	N.A.
	SMARCA5	4:143543509|143543972	Full	2	269	1
	RHOBTB3	5:95755396|95763620	Full	2	479	1
	CAMSAP1	9:135881633|135883078	Full	2	425	1
		9:135850137|135883078	N.A.	N.A.	N.A.	N.A.
		9:135866456|135883078	N.A.	N.A.	N.A.	N.A.
SRR1721292	HIPK3	11:33286413|33287511	BSJ	1	1099	1
		11:33286413|33328633	N.A.	N.A.	N.A.	N.A.
	SETD3	14:99458279|99465813	Break	5	678	1
	SLC8A1	2:40428473|40430301	N.A.	N.A.	N.A.	N.A.
		2:40428473|40430304	BSJ	1	1832	1
		2:40428475|40430301	N.A.	N.A.	N.A.	N.A.
		2:40428475|40430304	N.A.	N.A.	N.A.	N.A.
	SMARCA5	4:143543509|143543972	Full	2	269	1
	RHOBTB3	5:95755396|95763620	Break	4	1029	1
	CAMSAP1	9:135881633|135883078	BSJ	2	425	1
		9:135850137|135883078	Break	6	1079	1
		9:135866456|135883078	BSJ	3	506	1
SRR1721306	FAT3	11:92352096|92355404	BSJ	1	3309	1
	HIPK3	11:33286413|33287511	BSJ	1	1099	1
		11:33286413|33328633	N.A.	N.A.	N.A.	N.A.
	SETD3	14:99458279|99465813	Break	5	678	1
	ASXL1	20:32366384|32369123	Full	2	192	1
		20:32366384|32371874	Full	3	289	1
	SLC8A1	2:40428473|40430301	N.A.	N.A.	N.A.	N.A.
		2:40428473|40430304	BSJ	1	1832	1
		2:40428475|40430301	N.A.	N.A.	N.A.	N.A.
		2:40428475|40430304	N.A.	N.A.	N.A.	N.A.
	SMARCA5	4:143543509|143543972	Full	2	269	1
	CAMSAP1	9:135881633|135883078	BSJ	3	425	1
		9:135850137|135883078	Full	2	103	1
		9:135866456|135883078	BSJ	3	506	1
SRR1721300	FAT3	11:92352096|92355404	BSJ	1	3309	1
	HIPK3	11:33286413|33287511	BSJ	1	1099	1
		11:33286413|33328633	N.A.	N.A.	N.A.	N.A.
	SETD3	14:99458279|99465813	Full	3	461	1
	ASXL1	20:32366384|32369123	Full	2	192	1
		20:32366384|32371874	Break	3	295	1
	SLC8A1	2:40428473|40430301	BSJ	1	1829	0.998
		2:40428473|40430304	BSJ	1	1832	1
		2:40428475|40430301	N.A.	N.A.	N.A.	N.A.
		2:40428475|40430304	N.A.	N.A.	N.A.	N.A.
	SMARCA5	4:143543509|143543972	Full	2	269	1
	RHOBTB3	5:95755396|95763620	Full	2	479	1
	CAMSAP1	9:135881633|135883078	Full	2	168	1
		9:135850137|135883078	Break	6	1079	1
		9:135866456|135883078	BSJ	3	506	1
SRR1721283	HIPK3	11:33286413|33287511	BSJ	1	1099	1
		11:33286413|33328633	N.A.	N.A.	N.A.	N.A.
	ASXL1	20:32366384|32369123	Full	2	192	1
		20:32366384|32371874	Break	3	295	1
	SLC8A1	2:40428473|40430301	BSJ	1	1829	0.998
		2:40428473|40430304	BSJ	1	1832	1
		2:40428475|40430301	N.A.	N.A.	N.A.	N.A.
		2:40428475|40430304	N.A.	N.A.	N.A.	N.A.
	SMARCA5	4:143543509|143543972	Full	2	269	1
	RHOBTB3	5:95755396|95763620	Full	2	479	1
	CAMSAP1	9:135881633|135883078	Break	2	425	1
		9:135850137|135883078	Break	6	1079	1
		9:135866456|135883078	Break	3	506	1
SRR1721301	FAT3	11:92352096|92355404	BSJ	1	3309	1
	HIPK3	11:33286413|33287511	BSJ	1	1099	1
		11:33286413|33328633	N.A.	N.A.	N.A.	N.A.
	ASXL1	20:32366384|32369123	Full	2	192	1
		20:32366384|32371874	Break	3	295	1
	SLC8A1	2:40428473|40430301	N.A.	N.A.	N.A.	N.A.
		2:40428473|40430304	BSJ	1	1832	1
		2:40428475|40430301	N.A.	N.A.	N.A.	N.A.
		2:40428475|40430304	N.A.	N.A.	N.A.	N.A.
	SMARCA5	4:143543509|143543972	Full	2	269	1
	CAMSAP1	9:135881633|135883078	Full	2	425	1
		9:135850137|135883078	N.A.	N.A.	N.A.	N.A.
		9:135866456|135883078	N.A.	N.A.	N.A.	N.A.
N.A. = Not applicable. This means the corresponding bsj site was not identified in the sample.
Reconstruction type: the annotated type of recontructed circRNA by CIRI-full. Full - circRNAs that are completely characterized; Break - circRNAs that are partially characterized; BSJ - circRNAs that only have back-splicing junction sites.

## Sheet: Supplementary_Table_S5
Supplementary Table S5. The estimated expression values by different computational tools and the experimental expression value by RT-qPCR for all circRNAs in 10 samples
SRR_id	Gene_name	Organ	CT value	AQUARIUM	NBR_AQUARIUM	CIRIquant	BSJ_CIRIquant	CIRI2	CIRIfull	CLEAR	BSJ_clear	KNIFE
SRR1721279	FAT3	Adrenal	25.8	10.491	7.212	0.3029	6	6		1.60537	6	3
	HIPK3	Adrenal	23.6	36.2937	24.951	3.1807	63	66		17.6591	66	22
	SETD3	Adrenal	26.5	3.46814	2.384	0.3534	7	7	7	1.60537	6	4
	ASXL1	Adrenal	27	6.62895	4.557	1.0098	20	28	28	6.95661	26	14
	SLC8A1	Adrenal	25	26.3848	18.139	1.9185	38	39		11.2376	36	15
	SMARCA5	Adrenal	23.4	39.6893	27.286	1.6156	32	33	33	7.49173	28	11
	RHOBTB3	Adrenal	23.8	28.8678	19.847	2.171	43	43	43	11.5052	43	28
	CAMSAP1	Adrenal	26.4	6.44267	4.429	1.0098	20	20	18	4.28099	20	7
SRR1721298	FAT3	kidney	24.3	47.4075	18.209	0.2595	6	8		1.90046	8	7
	HIPK3	kidney	24.1	28.8871	11.095	1.4704	34	36		8.31452	35	13
	SLC8A1	kidney	24.9	68.8887	26.46	1.4704	34	34		6.65161	28	19
	SMARCA5	kidney	23.2	80.4681	30.907	1.4271	33	37	37	8.31452	35	23
	CAMSAP1	kidney	26.1	9.24908	3.553	0.9081	20	21	4	4.75115	20	7
SRR1721313	FAT3	stomach	22.1	42.3416	36.551	3.4444	67	70		18.7772	68	41
	HIPK3	stomach	21.8	87.8747	75.857	3.7529	73	179		49.7043	180	52
	SETD3	stomach	24.3	18.9055	16.32	1.7479	34	35	35	10.217	37	22
	ASXL1	stomach	25.7	4.77351	4.121	2.3135	45	50	50	13.8067	50	23
	SLC8A1	stomach	22.4	24.9459	21.534	2.262	45	43		12.4261	42	18
	SMARCA5	stomach	20.9	61.4921	53.083	3.136	61	64	64	16.8442	61	25
	RHOBTB3	stomach	23.3	34.6337	29.897	2.3134	45	47	47	13.2545	48	26
	CAMSAP1	stomach	24.2	14.0296	12.111	1.9021	37	39	35	8.00791	29	12
SRR1721290	FAT3	heart	26.4	4.84882	10.737	0.4299	13	12		2.5079	14	10
	HIPK3	heart	22.1	96.617	213.161	7.1106	215	569	11	102.466	572	198
	SETD3	heart	25.1	21.2974	47.16	3.3073	100	103	103	18.451	103	69
	ASXL1	heart	25	10.8314	23.539	2.6459	80	123	123	17.9136	100	60
	SLC8A1	heart	18.8	1170.29	2555.25	188.913	5741	6611	33	1147.54	6406	2944
	SMARCA5	heart	23.1	50.0085	110.736	5.3578	162	170	170	28.3034	158	87
	RHOBTB3	heart	22	80.8424	179.012	14.1552	428	620	442	76.3118	426	292
	CAMSAP1	heart	25.8	3.87753	8.586	1.4221	43	38	38	7.16542	40	25
SRR1721297	FAT3	intestine	24	22.4657	16.548	1.3064	24	24		7.13777	24	15
	HIPK3	intestine	22.7	64.4796	47.496	6.3689	117	123		34.2018	115	45
	SETD3	intestine	25	6.24387	4.536	2.3951	44	45	45	13.3833	45	27
	ASXL1	intestine	25.9	6.37248	4.5	0.4354	8	26	5	6.24555	21	16
	SLC8A1	intestine	24.2	40.697	29.978	3.5927	66	70		21.4133	72	29
	SMARCA5	intestine	22.3	76.1112	56.064	2.9939	55	58	58	15.1678	51	29
	RHOBTB3	intestine	23.5	25.217	18.575	1.8508	34	37	37	10.4092	35	27
	CAMSAP1	intestine	26.2	8.64246	6.366	1.0343	19	19	9	5.65074	19	6
SRR1721307	FAT3	stomach	23.8	23.0877	14.864	0.6808	17	15		3.00276	14	9
	HIPK3	stomach	23.1	29.7074	19.126	1.5618	39	39		8.36484	39	14
	SETD3	stomach	26.3	3.37018	2.17	0.2803	7	8	8	1.71586	8	4
	ASXL1	stomach	27.3	4.13363	2.661	0.2002	5	11	11	2.14483	10	3
	SLC8A1	stomach	25.4	15.4414	9.941	0.6808	17	15		2.5738	12	4
	SMARCA5	stomach	22.9	50.5526	32.547	1.1213	28	30	30	5.36207	25	13
	RHOBTB3	stomach	24.1	11.1912	7.205	0.5607	14	15	15	3.00276	14	7
	CAMSAP1	stomach	25.9	7.88404	5.076	0.5606	14	14	12	2.5738	12	4
SRR1721292	HIPK3	intestine	23	38.4505	22.21	2.2124	56	57		12.8426	61	17
	SETD3	intestine	25.6	10.1581	5.867	0.3556	9	8	8	2.52641	12	3
	SLC8A1	intestine	24.8	29.9822	17.318	1.0666	28	26	7	5.68442	27	5
	SMARCA5	intestine	22.4	79.5006	45.92	1.3827	35	37	37	7.15816	34	22
	RHOBTB3	intestine	23.9	7.80422	4.508	0.3556	9	9	9	1.89481	9	4
	CAMSAP1	intestine	25.6	8.48794	4.903	0.8296	21	23	5	4.63175	22	8
SRR1721306	FAT3	lung	21	232.498	150.228	7.9451	166	180		47.2266	169	123
	HIPK3	lung	21.9	122.629	79.236	7.61	159	159		44.4322	159	70
	SETD3	lung	24.8	20.5021	13.247	1.4359	30	31	31	8.10398	29	18
	ASXL1	lung	25.5	11.0396	7.133	0.4786	10	29	29	7.82453	28	18
	SLC8A1	lung	25.6	10.3316	6.676	0.8137	17	17		4.75061	17	9
	SMARCA5	lung	20.8	157.621	101.846	5.7913	121	138	138	31.0187	111	68
	CAMSAP1	lung	25.1	11.2954	7.3	1.8665	39	32	4	9.50122	34	19
SRR1721300	FAT3	kidney	25.3	19.9419	6.897	0.4793	7	7		2.65424	7	4
	HIPK3	kidney	22.7	129.071	44.641	6.1619	90	90		34.5051	91	36
	SETD3	kidney	24.4	18.5127	6.403	1.7117	25	25	25	9.47942	25	16
	ASXL1	kidney	26.1	15.2912	5.289	0.6846	10	26	26	7.96272	21	13
	SLC8A1	kidney	23.8	82.62	28.575	4.8611	72	71		24.6465	65	45
	SMARCA5	kidney	22.7	112.801	39.014	2.944	43	44	44	15.5463	41	23
	RHOBTB3	kidney	23.7	47.9189	16.573	2.8756	42	48	48	17.4421	46	31
	CAMSAP1	kidney	25.9	14.8434	5.134	1.8486	27	15	15	8.72107	23	13
SRR1721283	HIPK3	Adrenal	22.4	35.4907	29.405	3.034	67	66		16.8758	64	32
	ASXL1	Adrenal	25.8	3.59762	2.981	0.634	14	19	19	3.69159	14	8
	SLC8A1	Adrenal	22.9	61.4219	50.89	3.7133	82	87		20.5674	78	46
	SMARCA5	Adrenal	24.9	57.3861	47.546	1.6755	37	39	39	8.17424	31	22
	RHOBTB3	Adrenal	21.9	41.7298	34.575	3.2604	72	77	77	17.4032	66	36
	CAMSAP1	Adrenal	24.7	13.9201	11.533	2.2189	49	43	43	10.8111	41	26
SRR1721301	FAT3	lung	23.2	54.2889	25.437	0.7266	18	18		4.00609	18	12
	HIPK3	lung	23.2	28.3573	13.287	1.211	30	32		6.89937	31	9
	ASXL1	lung	27.2	3.60801	1.69	0.1615	4	9	9	1.55792	7	5
	SLC8A1	lung	27	7.95211	3.726	0.2826	7	7		1.55792	7	4
	SMARCA5	lung	22.4	72.8108	34.115	1.2514	31	31	31	6.45425	29	16
	CAMSAP1	lung	25.7	12.4191	5.819	0.8881	22	25	23	5.56401	25	8

## Sheet: Supplementary_Table_S6
Supplementary Table S6. Time and memory usage of the detection and quantification module in AQUARIUM implementation on three simulated RNA-seq datasets, which was performed on a DELL-T7600 workstation with 2.4G Intel Xeon CPUs and 128G memory
Sample details		Sample1	Sample2	Sample3
Data size (Gb)		11	22	42
Read pair number (million)		15	30	60
Read length (bp)		150	150	150
Library type		Ribo-	Ribo-	Ribo-
Read type		Paired-end	Paired-end	Paired-end
CircRNA number		2043	2259	2343
Detection module	Thread	5	5	5
	Time (min)	61	116	246
	Memory usage (Gb)	35	36	36
Quantification module	Thread	5	5	5
	Time (min)	11	14	18
	Memory usage (Gb)	3.16	3.18	3.21

## Sheet: Supplementary_Table_S7
Supplementary Table S7. The experimentally determined expression values of circular isoforms by RT-qPCR and the estimated circRNA expressions by CIRI-full and AQUARIUM in the biological RNA-seq dataset Hela-R3
BSJ	Length	CIRI-full	AQUARIUM	RT-qPCR
		(BSJ count)	(TPM)	(2^(-ΔCT)*1000)
12:109046048|109048186	395	3	5.2201	2.55619
12:109046048|109048186	251	5	3.13334	2.59246
10:74474869|74475660	257	1	2.01686	1.43314
12:116668338|116675510	398	7	2.9631	2.40504
12:116668338|116675510	496	20	5.37481	4.94319
8:141874411|141900868	482	47	14.3395	5.19795
8:141874411|141900868	315	5	0	0.096913
8:141856359|141900868	625	53	7.29685	1.37782
8:141856359|141900868	458	4	3.38452	0.150322
1:117944808|117963271	553	274	64.8545	143.778
9:33953283|33963789	377	11	3.18786	2.12088
9:33953283|33963789	309	6	2.94651	1.31422
